# Supplementary material
Source: PubMed Central journal article supplement (PMC3191940)
Supplement: NIHMS309875-supplement-1.pdf [file NIHMS309875-supplement-1.pdf]

Supplementary Figure 1

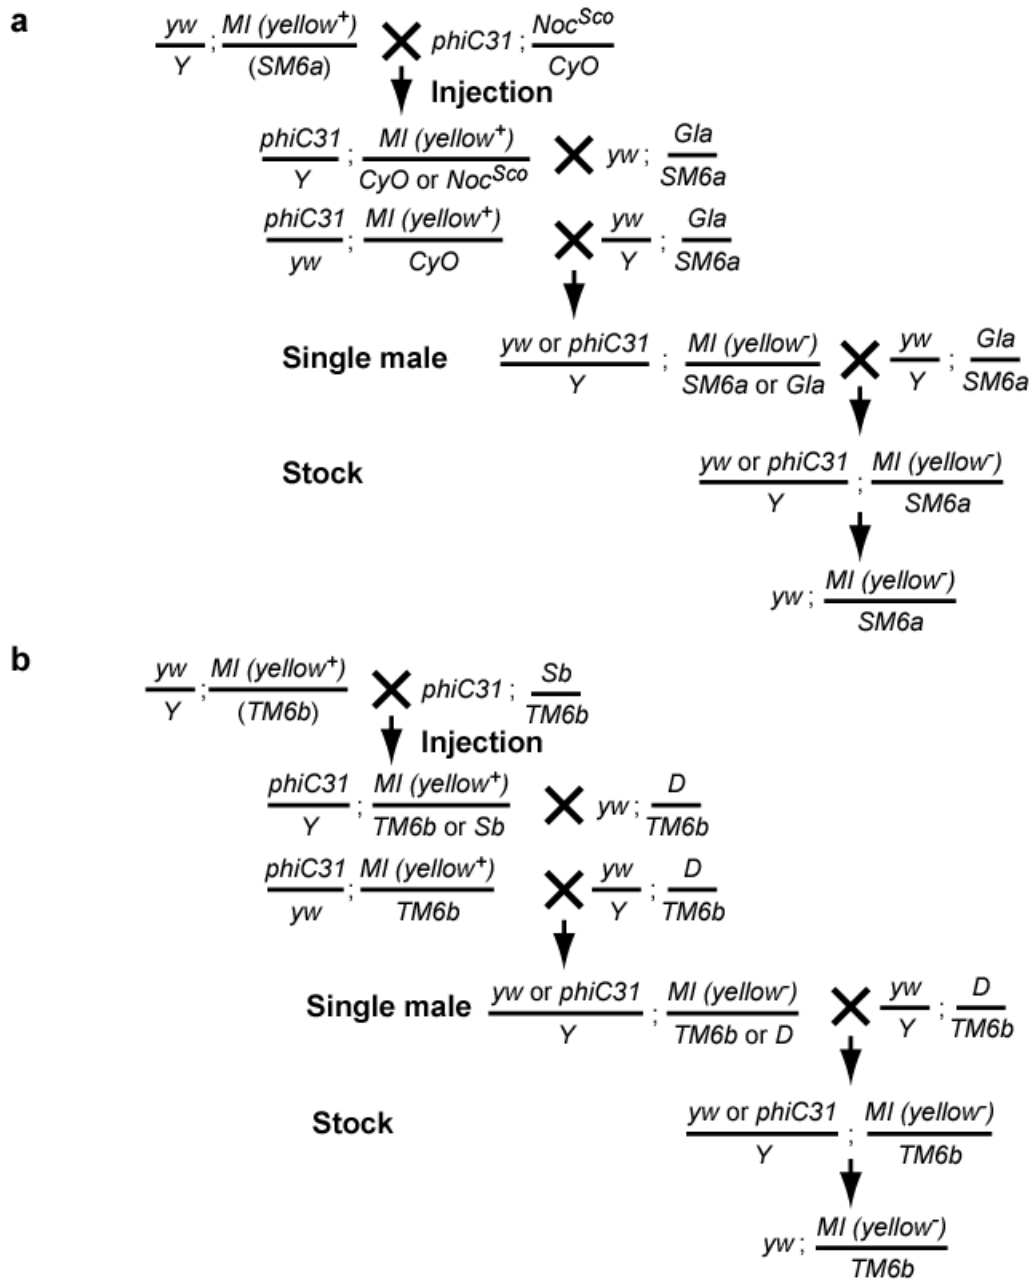

Supplementary Figure 1. Crossing schemes for RMCE of MiMIC insertions on the second and third chromosomes. (a) Crosses for chromosome 2. (b) Crosses for chromosome 3. The phiC31 chromosome is *yw*.

Supplementary Figure 2

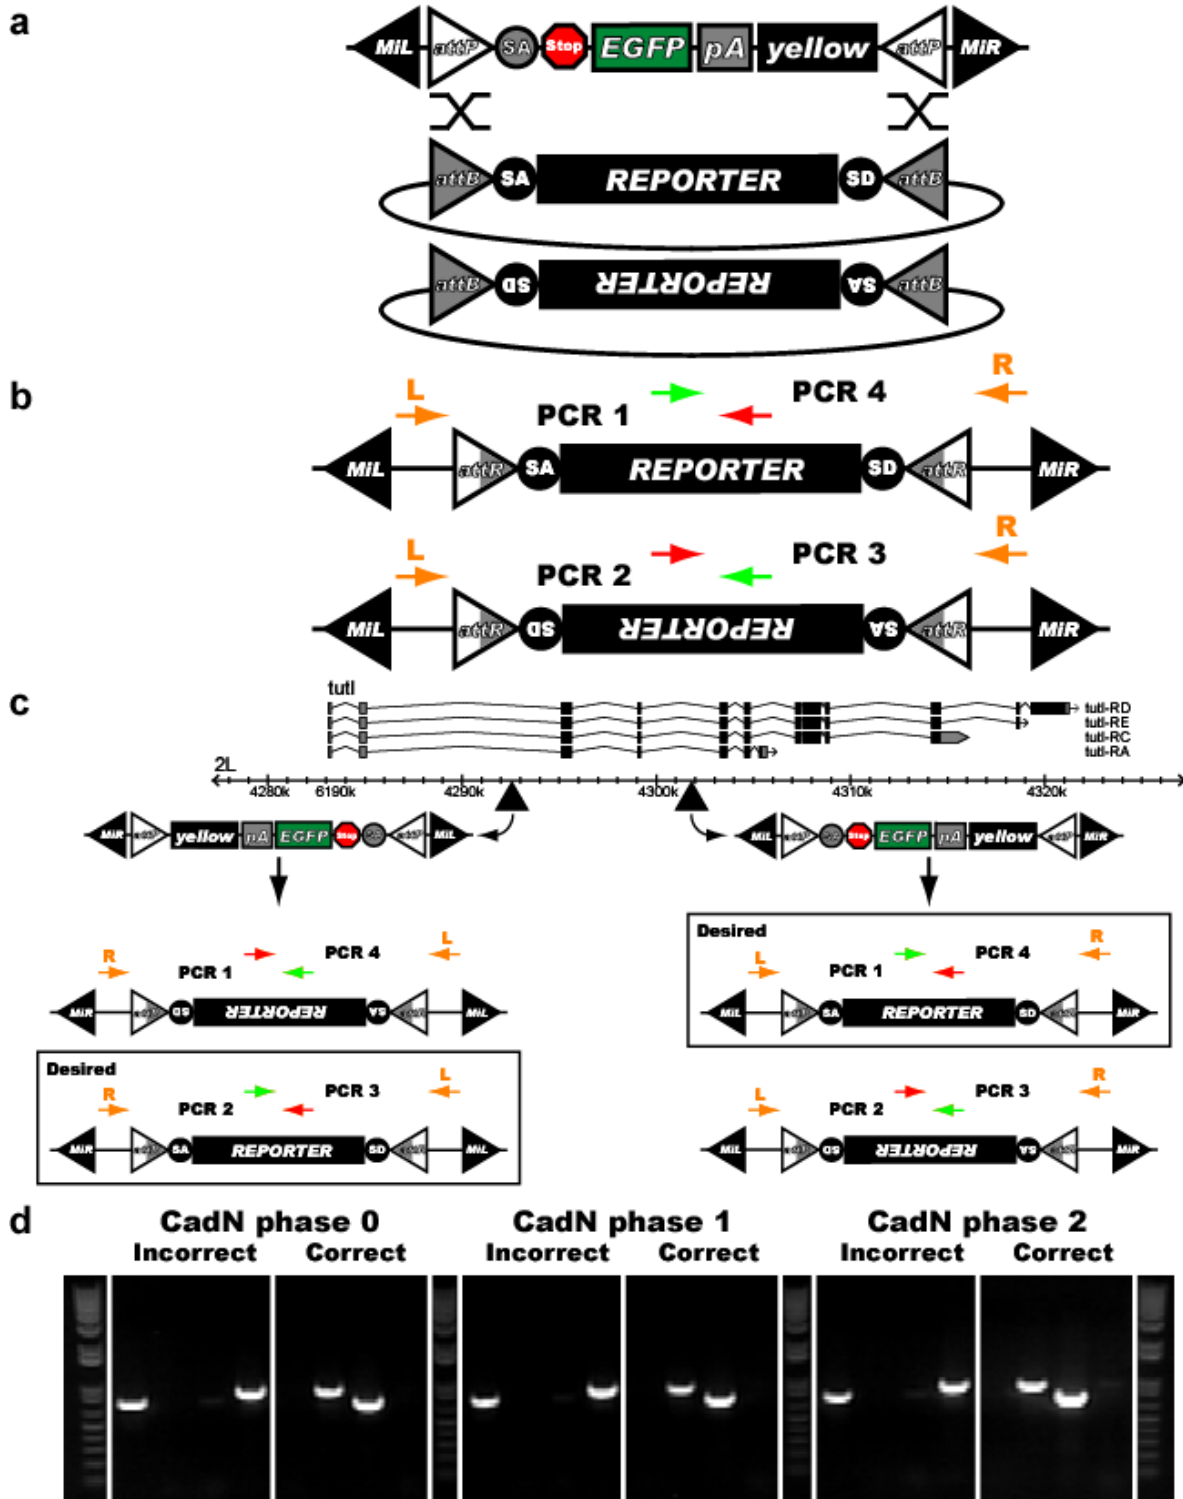

**Supplementary Figure 2. Orientation of RMCE events within MiMIC insertions.** (a) RMCE with inverted *attP* sites flanking the gene trap and marker gene within the MiMIC transposon and inverted *attB* sites flanking the replacement cassette within a plasmid construct can result in the integration of the cassette in either of two orientations, one of which results in the desired allele. (b) Four PCR reactions distinguish between integration in the two orientations: a RMCE event is either positive for PCR reactions 1 and 4 or positive for PCR reactions 2 and 3. The desired PCR results depend on the orientation of the MiMIC insertion relative to the gene. (c) Illustrations of PCR results for the possible outcomes of RMCE events in two MiMIC insertions in the *tutI* gene. With *tutI* located on the forward strand and a MiMIC insertion on the reverse strand (Left), a “2/3” PCR pattern indicates a productive RMCE event. For a MiMIC insertion on the forward strand (Right), a “1/4” PCR pattern indicates a productive RMCE event. (d) PCR results for RMCE events in *CadN* using the 3 different splice phase plasmids containing the EGFP-FIAsh-StrepII-3xFlag tag. Only the correct “2/3” PCR pattern for the phase 0 plasmid resulted in expression (**Fig.3**).

### Supplementary Figure 3

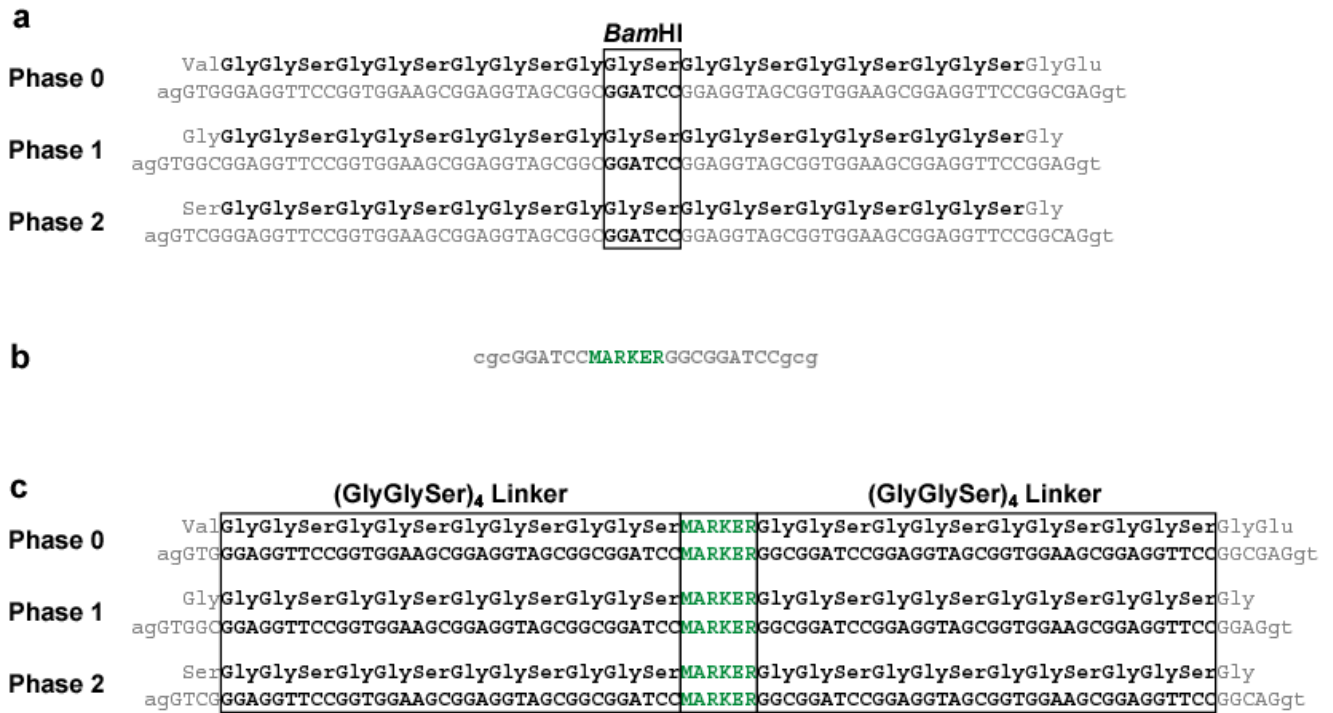

**Supplementary Figure 3. Construction of protein-trap plasmids for three intron phases.** (a) The multiple cloning sites and surrounding peptide linker coding sequences for constructing protein-trap plasmids in the three intron phases. The following sequence elements are indicated: the “ag” dinucleotide of the 5’ SA site, the sequence encoding the incomplete (GlyGlySer)<sub>4</sub> peptide linkers, the *Bam*HI site between the peptide linkers used for subcloning of protein-trap tags, and the “gt” dinucleotide of the 3’ SD site. (b) Each protein-trap tag is amplified as indicated, flanked with a *Bam*H1 site and restriction stuffer at the 5’ end, and a “GGC” trinucleotide followed by a *Bam*HI site and a restriction stuffer at the 3’ end. (c) After cloning of the tag into the *Bam*HI site in the three intron phase plasmids, the resulting tag is flanked by flexible (GlyGlySer)<sub>4</sub> linkers at either end of the artificial exon.

## Supplementary Figure 4

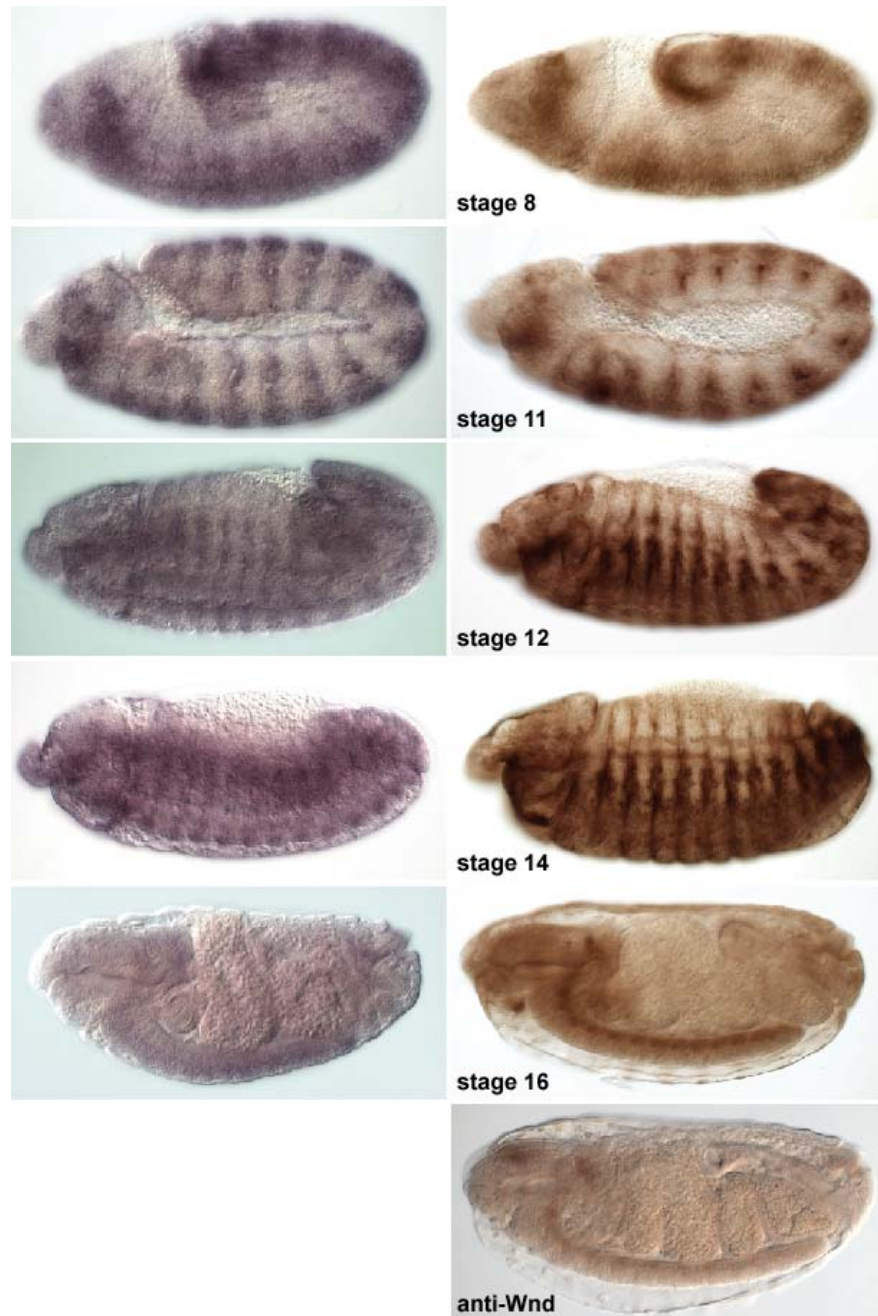

### Supplementary Figure 4. Dynamic expression of Wnd during embryogenesis.

Expression of *wnd* transcript detected by mRNA *in situ* hybridization (**Left**) and expression of Wnd protein by anti-EGFP staining of a Wnd::EGFP-FIAsH-StrepII-3xFlag protein trap (**Right**) at embryonic stages 8, 11, 12, 14, 16. The mRNA and fusion

protein expression patterns are very similar. Bottom right, expression of Wnd as detected with an anti-Wnd antibody at embryonic stages 16 is shown (bottom).

## Supplementary Table 1

| Plasmid                                                 | Description                                          |
|---------------------------------------------------------|------------------------------------------------------|
| pBS-SK-attB1-2                                          | General cloning and correction plasmid               |
| pBS-KS-attB1-2-GT-SA                                    | General gene trap plasmid                            |
| pBS-KS-attB1-2-GT-SA-mCherry-SV40                       | mCherry gene trap plasmid                            |
| pBS-KS-attB1-2-GT-SA-GAL4-Hsp70pA                       | GAL4 gene trap plasmid                               |
| pBS-KS-attB1-2-GT-SA-Flpo-SV40                          | Flp gene trap plasmid                                |
| pBS-KS-attB1-2-GT-SA-QF-Hsp70                           | QF gene trap plasmid                                 |
| pBS-KS-attB1-2-PT-SA-SD-0                               | General splice phase 0 protein trap plasmid          |
| pBS-KS-attB1-2-PT-SA-SD-0-EGFP-FIAsH-StrepII-TEV-3xFlag | Splice phase 0 EGFP-FIAsH-StrepII-TEV-3xFlag plasmid |
| pBS-KS-attB1-2-PT-SA-SD-0-mCherry                       | Splice phase 0 mCherry plasmid                       |
| pBS-KS-attB1-2-PT-SA-SD-0-EBFP2-3xMyc                   | Splice phase 0 EBFP2-3xMyc plasmid                   |
| pBS-KS-attB1-2-PT-SA-SD-0-TagRFP-T-3xHA                 | Splice phase 0 TagRFP-3xHA plasmid                   |
| pBS-KS-attB1-2-PT-SA-SD-0-HRP-S                         | Splice phase 0 HRP-S plasmid                         |
| pBS-KS-attB1-2-PT-SA-SD-0-Dendra-V5                     | Splice phase 0 Dendra-V5 plasmid                     |
| pBS-KS-attB1-2-PT-SA-SD-0-KillerRed-V5                  | Splice phase 0 KillerRed-V5 plasmid                  |
| pBS-KS-attB1-2-PT-SA-SD-1                               | General splice phase 1 protein trap plasmid          |
| pBS-KS-attB1-2-PT-SA-SD-1-EGFP-FIAsH-StrepII-TEV-3xFlag | Splice phase 1 EGFP-FIAsH-StrepII-TEV-3xFlag plasmid |
| pBS-KS-attB1-2-PT-SA-SD-1-mCherry                       | Splice phase 1 mCherry plasmid                       |
| pBS-KS-attB1-2-PT-SA-SD-1-EBFP2-3xMyc                   | Splice phase 1 EBFP2-3xMyc plasmid                   |
| pBS-KS-attB1-2-PT-SA-SD-1-TagRFP-T-3xHA                 | Splice phase 1 TagRFP-3xHA plasmid                   |
| pBS-KS-attB1-2-PT-SA-SD-1-HRP-S                         | Splice phase 1 HRP-S plasmid                         |
| pBS-KS-attB1-2-PT-SA-SD-1-Dendra-V5                     | Splice phase 1 Dendra-V5 plasmid                     |
| pBS-KS-attB1-2-PT-SA-SD-1-KillerRed-V5                  | Splice phase 1 KillerRed-V5 plasmid                  |
| pBS-KS-attB1-2-PT-SA-SD-2                               | General splice phase 2 protein trap plasmid          |
| pBS-KS-attB1-2-PT-SA-SD-2-EGFP-FIAsH-StrepII-TEV-3xFlag | Splice phase 2 EGFP-FIAsH-StrepII-TEV-3xFlag plasmid |
| pBS-KS-attB1-2-PT-SA-SD-2-mCherry                       | Splice phase 2 mCherry plasmid                       |
| pBS-KS-attB1-2-PT-SA-SD-2-EBFP2-3xMyc                   | Splice phase 2 EBFP2-3xMyc plasmid                   |
| pBS-KS-attB1-2-PT-SA-SD-2-TagRFP-T-3xHA                 | Splice phase 2 TagRFP-3xHA plasmid                   |
| pBS-KS-attB1-2-PT-SA-SD-2-HRP-S                         | Splice phase 2 HRP-S plasmid                         |
| pBS-KS-attB1-2-PT-SA-SD-2-Dendra-V5                     | Splice phase 2 Dendra-V5 plasmid                     |
| pBS-KS-attB1-2-PT-SA-SD-2-KillerRed-V5                  | Splice phase 2 KillerRed-V5 plasmid                  |

### Supplementary Table 1. Plasmids for RMCE-based tagging in MiMIC insertion

lines. Correction plasmid, gene-trap plasmids, and protein-trap plasmids for intron phases 0, 1 and 2 are indicated. Accession numbers for master plasmids indicated in grey are available from GenBank. Sequence information of all components is available in Supplementary Data. All plasmids are available from the Drosophila Genomics Resource Center (<https://dgrc.cgb.indiana.edu/>).

## Supplementary Table 2

| MiMIC                   | # Lines      | % of total | % of subclass |
|-------------------------|--------------|------------|---------------|
| <b>Intergenic</b>       | 1,340        | 36.9%      |               |
| 5' upstream             | 121          | 3.3%       | 9.0%          |
| 3' downstream           | 118          | 3.2%       | 8.8%          |
| TE                      | 32           | 0.9%       | 2.4%          |
| <b>Other intergenic</b> | 1,069        | 29.4%      | 79.8%         |
| <b>Intragenic</b>       | 2,293        | 63.1%      |               |
| 5' UTR exon             | 68           | 1.9%       | 3.0%          |
| 5' UTR intron           | 467          | 12.9%      | 20.4%         |
| Coding exon             | 344          | 9.5%       | 15.0%         |
| Coding intron           | 1,190        | 32.8%      | 51.9%         |
| 3' UTR exon             | 219          | 6.0%       | 9.6%          |
| 3' UTR intron           | 5            | 0.1%       | 0.2%          |
| <b>Total</b>            | <b>3,633</b> |            |               |

### Supplementary Table 2. Association of MiMIC insertions with gene annotation

**features.** 63% of mapped MiMIC insertions are located within annotated genes (FlyBase r5.32), and the remainder are in intergenic regions. “5' upstream” and “3' downstream” are insertions within 500 bp of the 5' or 3' end of a gene, respectively. “TE” are insertions that can be mapped to unique sites within transposable elements.



**Supplementary Table 3**

| <i>Rfx</i> | MI00053  | Rfx49    | Rfx253   | 7636 |
|------------|----------|----------|----------|------|
| MI00053    | Lethal   |          |          |      |
| Rfx49      | Escapers |          |          |      |
| Rfx253     | Escapers | Escapers |          |      |
| 7636       | Escapers | Escapers | Escapers |      |

| <i>tutI</i> | MI00290 | 10979 | TutI4 | TutI23 | TutI GAL4 | TutI Ex383 | 702 |
|-------------|---------|-------|-------|--------|-----------|------------|-----|
| MI00290     | Lethal  |       |       |        |           |            |     |
| 10979       | NO      |       |       |        |           |            |     |
| TutI4       | NO      | NO    |       |        |           |            |     |
| TutI23      | NO      | NO    | NO    |        |           |            |     |
| TutI GAL4   | NO      | NO    | NO    | NO     |           |            |     |
| TutI Ex383  | NO      | NO    | NO    | FEW    | NO        |            |     |
| 702         | NO      | NO    | NO    | NO     | NO        | NO         |     |

| <i>comm</i>  | MI00380 | A490 | $\Delta e39$ | 17644 | 2992 | 5461 |
|--------------|---------|------|--------------|-------|------|------|
| MI00380      | Lethal  |      |              |       |      |      |
| A490         | NO      |      |              |       |      |      |
| $\Delta e39$ | NO      | NO   |              |       |      |      |
| 17644        | NO      | FEW  | NO           |       |      |      |
| 2992         | NO      | NO   | NO           | NO    |      |      |
| 5461         | NO      | NO   | NO           | NO    | NO   |      |

| <i>wnd</i> | MI00494 | Wnd1 | Wnd2 | Wnd3 | 5584 | 7942 |
|------------|---------|------|------|------|------|------|
| MI00494    | Lethal  |      |      |      |      |      |
| Wnd1       | YES     |      |      |      |      |      |
| Wnd2       | YES     | YES  |      |      |      |      |
| Wnd3       | YES     | YES  | YES  |      |      |      |
| 5584       | YES     | YES  | YES  | YES  |      |      |
| 7942       | YES     | YES  | YES  | YES  | YES  |      |

**Supplementary Table 3. Complementation analysis of lethal MiMIC insertion lines.**

Results of complementation analysis are indicated for  $Mi\{MIC\}Rfx^{MI00053}$  and previously described *Rfx* mutant alleles (see Online Methods),  $Mi\{MIC\}tutI^{MI00290}$  and other *tutI* alleles (see Online Methods),  $Mi\{MIC\}comm^{MI00380}$  and other *comm* alleles (see Online Methods), and  $Mi\{MIC\}wnd^{MI00494}$  and other *wnd* alleles (see Online Methods). Failure to complement (NO); escapers illustrate a phenotype previously described for *Rfx* mutations (Escapers), and a few escapers without an obvious phenotype (FEW).

**Supplementary Table 4**

| Gene               | MiMIC   | Gene trap | Lethality | RMCE       |       |            |     |
|--------------------|---------|-----------|-----------|------------|-------|------------|-----|
|                    |         |           |           | Cassette   | Total | Expression | %   |
| <i>gogo</i>        | MI00065 | NO        | V         | GAL4-Hsp70 | 4     | 2          | 50% |
| <i>Tl</i>          | MI00181 | NO        | V         | GAL4-Hsp70 | 4     | 1          | 25% |
|                    |         |           |           | Flp-SV40   | 6     | 2          | 33% |
|                    |         |           |           | QF-Hsp70   | 3     | 0          | 0%  |
| <i>caps</i>        | MI00249 | NO        | L         | GAL4-Hsp70 | 6     | 1          | 17% |
|                    |         |           |           | Flp-SV40   | 5     | 2          | 40% |
|                    |         |           |           | QF-Hsp70   | 3     | 0          | 0%  |
| <i>MYPT-75D</i>    | MI00314 | NO        | V         | GAL4-Hsp70 | 6     | 1          | 17% |
|                    |         |           |           | Flp-SV40   | 6     | 1          | 17% |
|                    |         |           |           | QF-Hsp70   | 5     | 2          | 40% |
| <i>BM-40-SPARC</i> | MI00329 | NO        | L         | GAL4-Hsp70 | 3     | 2          | 67% |
|                    |         |           |           | Flp-SV40   | 6     | 1          | 17% |
|                    |         |           |           | QF-Hsp70   | 2     | 0          | 0%  |
| <b>Total</b>       |         |           |           |            | 59    | 15         | 25% |

**Supplementary Table 4. Summary of gene-trapping experiments.** MiMIC insertions in five genes were tagged with different gene-trap cassettes: gene name, MiMIC line identifier, gene-trap status, and associated phenotype, viable (V) or lethal (L), are indicated. Results for three gene-trap cassettes for each gene: total lines, number of expressing lines, percentage of expressing lines. The total numbers of lines and expressing lines, and the average percentage of expressing lines, are indicated.

**Supplementary Table 5**

| <b>Primer</b>               | <b>Sequence</b>                                            |
|-----------------------------|------------------------------------------------------------|
| <b>pMiLR-Correction-TOP</b> | AGCTACCTTAATCTCAAGAAGAGCAAAACAAAAGCAACTAATGTAACGGAAGCTTGA  |
| <b>pMiLR-Correction-</b>    | TAATTTCCCCCGCGGGAATTCAAGCTTCCGTTACATTAGTTGCTTTTGTGTTTCTCTT |
| <b>attP1-pMiLR-F</b>        | CCGAAGCTTCCCAGGTCAGAAGCGGTTTTTCGGGAG                       |
| <b>attP1-pMiLR-R</b>        | CCGCTCGAGGCGGCCGCTCTAGACCCGGGGGATCCAACCCCTTGTGTCATGTCGG    |
| <b>attP2-pMiLR-F</b>        | CCGCTCGAGACTAGTCTGCAGGTCGACGAATTCAACCCCTTGTGTCATGTCGGCGA   |
| <b>attP2-pMiLR-R</b>        | CCGCCGCGGCCAGGTCAGAAGCGGTTTTTCGGGAG                        |
| <b>MHC-SA-Xmal-F</b>        | TCCCCCGGGAGTCGATCCAACATGGCGACT                             |
| <b>MHC-SA-EGFP-R</b>        | CTCCTCGCCCTTGCTCACCATTTTGTAGTTAGTTAGACCTGCGGAAGAGAGATAAA   |
| <b>MHC-SA-EGFP-F</b>        | GATTTATCTCTCTTCCGCAGGTCTAACTAACTAACAAAATGGTGAGCAAGGGCGAG   |
| <b>EGFP-SpeI-R</b>          | GGACTAGTTGATCATAATCAGCCATACCAC                             |
| <b>attB1-pBS-F</b>          | CCGGAGCTCGCTAGCGATGTAGGTCACGGTCTCGAAG                      |
| <b>attB1-pBS-R</b>          | CCGGAATTCCTGCAGACTAGTTCTAGAGTCGACCATCATGATGGACCAGATGGGTG   |
| <b>attB2-pBS-F</b>          | CCGGAATTCCTCGAGGGATCCAAGCTTGTGACCATCATGATGGACCAGATGGGTG    |
| <b>attB2-pBS-R</b>          | CCGGGTACCATGCATGATGTAGGTCACGGTCTCGAAG                      |
| <b>SA-XbaI-F</b>            | GCTCTAGAAGTCGATCCAACATGGCGAC                               |
| <b>SA-PstI-R</b>            | AACTGCAGGACCTGCGGAAGAGAGATAAATC                            |
| <b>GAL4-Hsp70-EcoRI-F</b>   | GGAATTCTAACTAACTAACAAAATGAAGCTACTGTCTTCTATCGAAC            |
| <b>GAL4-Hsp70-BamHI-R</b>   | CGCGGATCCGGCCGCTCTAGAACTAGTGGATC                           |
| <b>QF-SV40-EcoRI-F</b>      | GGAATTCTAACTAACTAACAAAATGCCGCCTAACGCAAGACACTC              |
| <b>QF-SV40-BamHI-R</b>      | CGCGGATCCGATCCAGACATGATAAGATACATTG                         |
| <b>Fipo-SV40-EcoRI-F</b>    | GGAATTCTAACTAACTAACAAAATGAGCCAGTTCGACATCCTG                |
| <b>Fipo-SV40-BamHI-R</b>    | CGCGGATCCGATCCAGACATGATAAGATACATTG                         |
| <b>SA-SD-Phase-0-R</b>      | CGCGGATCCGCCGCTACCTCCGCTTCCACCGGAACCTCCCACCTGCGGAAGAGAG    |
| <b>SA-SD-Phase-0-F</b>      | CGCGGATCCGGAGGTAGCGGTGGAAGCGGAGGTTCCGGCGAGGTAAGTTATTGAA    |
| <b>SD-HindIII-R</b>         | CCCAAGCTTAGAAGTTCAAATGGGCTTTC                              |
| <b>SA-SD-Phase-1-R</b>      | CGCGGATCCGCCGCTACCTCCGCTTCCACCGGAACCTCCGCCACCTGCGGAAGAG    |
| <b>SA-SD-Phase-1-F</b>      | CGCGGATCCGGAGGTAGCGGTGGAAGCGGAGGTTCCGGAGGTAAGTTATTGAACA    |

|                         |                                                          |
|-------------------------|----------------------------------------------------------|
| <b>SA-SD-Phase-2-R</b>  | CGCGGATCCGCCGCTACCTCCGCTTCCACCGGAACCTCCCGACCTGCGGAAGAGA  |
| <b>SA-SD-Phase-2-F</b>  | CGCGGATCCGGAGGTAGCGGTGGAAGCGGAGGTTCCGGCAGGTAAGTTATTGAAC  |
| <b>EGFPmultiFINAL-F</b> | CGCGGATCCGTGTCCAAGGGCGAGGAGCTG                           |
| <b>EGFPmultiFINAL-R</b> | CGCGGATCCGCCCTTGTGTCATCGTCCTTGTAATC                      |
| <b>Cherry-F</b>         | CGCGGATCCGTGAGCAAGGGCGAGGAGGATAAC                        |
| <b>Cherry-R</b>         | CGCGGATCCGCCCTTGTACAGCTCGTCCATG                          |
| <b>EBFP2-Myc-F</b>      | CGCGGATCCGTGTCCAAGGGCGAGGAGCTGTTC                        |
| <b>EBFP2-Myc-R</b>      | CGCGGATCCGCCGAGATCCTCCTCCGAGATCAG                        |
| <b>TagRFP-HA-F</b>      | CGCGGATCCGTGTCCAAGGGCGAGGAGCTGATC                        |
| <b>TagRFP-HA-R</b>      | CGCGGATCCGCCAGCGTAGTCTGGCACGTCGTAG                       |
| <b>HRP-S-F</b>          | CGCGGATCCCAGCTGACCCCCACCTTCTACGATAAC                     |
| <b>HRP-S-R1</b>         | TCGAACCTTAGCGGCTGCGGTCTCCTTGCCGCTTCCGCTGTTGCTGTTACCACGCG |
| <b>HRP-S-R2</b>         | CGCGGATCCGCCGCTATCCATGTGCTGGCGCTCGAACTTAGCGGCTGCGGTC     |
| <b>Dendra-V5-F</b>      | CGCGGATCCAACACCCCCGGCATCAACCTGATC                        |
| <b>Dendra-V5-R1</b>     | AGCAGTGGATTCGGGATCGGCTTGCCGCCGCTTCCCCACACCTGGCTGGGCAGGG  |
| <b>Dendra-V5-R2</b>     | CGCGGATCCGCCGGTGCTATCCAGTCCGAGCAGTGGATTCGGGATCGGCTTG     |
| <b>KillerRed-V5-F</b>   | CGCGGATCCGGCAGCGAGGGCGGACCAGCCCTG                        |
| <b>KillerRed-V5-R1</b>  | AGTCCGAGCAGTGGATTCGGGATCGGCTTGCCGCCGCTTCCATCCTCATCGGAGC  |
| <b>KillerRed-V5-R2</b>  | CGCGGATCCGCCGGTGCTATCCAGTCCGAGCAGTGGATTCGGGATC           |
| <b>mCherry-Seq-F</b>    | ACGGCGAGTTCATCTACAAG                                     |
| <b>mCherry-Seq-R</b>    | TTCAGCCTCTGCTTGATCTC                                     |
| <b>EGFPdo-Seq-F</b>     | GGATGACGGCACCTACAAGAC                                    |
| <b>EGFPdo-Seq-R</b>     | GTGGCTGTTGAAGTTGTAATC                                    |
| <b>EBFP2do-Seq-F</b>    | GGACGACGGCACCTACAAGAC                                    |
| <b>EBFP2do-Seq-R</b>    | GAAGTTGTAATCCAGCTTGTG                                    |
| <b>TagRFPdo-Seq-F</b>   | GGCTGCCTGATCTACAACGTG                                    |
| <b>TagRFPdo-Seq-R</b>   | GGGTACAGCATCTCGGTGTTG                                    |
| <b>Hrpdo-Seq-F</b>      | AAGGATAGCTTCCGCAACGTG                                    |
| <b>Hrpdo-Seq-R</b>      | GCTGAAGTTGTACAGGCGATC                                    |

|                          |                              |
|--------------------------|------------------------------|
| <b>Dendrado-Seq-F</b>    | GATAAGGGCATCTGCACCATC        |
| <b>Dendrado-Seq-R</b>    | ACGTGCAGCTTCTCGGTGCTG        |
| <b>Killerreddo-Seq-F</b> | CTACGAGCTGGATGATACCTG        |
| <b>Killerreddo-Seq-R</b> | CAGGATATCGACCAGCTGATC        |
| <b>GAL4-1R</b>           | TGATGAGCTGCCGAGTCAATC        |
| <b>GAL4-5F</b>           | AACTGTGCATCGTGCACCATC        |
| <b>FLP0-Seq-R</b>        | AGTAGATGTGCCTGGACACGCTTG     |
| <b>SV40pA-Long-F</b>     | TCCAACCTATGGAAGTGAATG        |
| <b>QF-Seq-R1</b>         | TTGGCCGTCTTCAGATGGATCTTG     |
| <b>Hsp70-pA-Alt-F</b>    | GTCTATCGATACCGTCGACTAAAG     |
| <b>Orientation-MiL-F</b> | GCGTAAGCTACCTTAATCTCAAGAAGAG |
| <b>Orientation-MiL-R</b> | CGCGGCGTAATGTGATTTACTATCATAC |
| <b>Wnd-F</b>             | CGGTGTGGTGCTATGGGAAAT        |
| <b>Wnd-R</b>             | GGCACGTCGATGGGCTGAGAT        |

**Supplementary Table 5. Primers.** Primers and sequences used in this study.

**Supplementary Table 6**

| phiC31 MIMIC injections: OVERVIEW Phase 0 Swapping |                  |       |       |                  |       |       |
|----------------------------------------------------|------------------|-------|-------|------------------|-------|-------|
| Inj                                                | MI00296/Rhea (3) |       |       | MI00393/CadN (2) |       |       |
|                                                    | Fertility        | Trans | %     | Fertility        | Trans | %     |
| COR-SK                                             | 61               | 28    | 45.9% | 22               | 8     | 36.4% |
| A-0                                                | 50               | 34    | 68.0% | 16               | 14    | 87.5% |
| A-1                                                | 39               | 25    | 64.1% | 16               | 10    | 62.5% |
| A-2                                                | 40               | 14    | 35.0% | 11               | 3     | 27.3% |
| C-0                                                | 53               | 21    | 39.6% | 8                | 2     | 25.0% |
| D-0                                                | 55               | 28    | 50.9% | 13               | 6     | 46.2% |
| E-0                                                | 49               | 28    | 57.1% | 13               | 6     | 46.2% |
| F-0                                                | 18               | 9     | 50.0% | 15               | 9     | 60.0% |
| G-0                                                | 100              | 39    | 39.0% | 15               | 8     | 53.3% |
| H-0                                                | 43               | 22    | 51.2% | 21               | 11    | 52.4% |

  

| phiC31 MIMIC injections: OVERVIEW Phase 1 Swapping |                 |       |       |                  |       |       |                  |       |       |
|----------------------------------------------------|-----------------|-------|-------|------------------|-------|-------|------------------|-------|-------|
| Inj                                                | MI00053/Rfx (3) |       |       | MI00290/tutI (2) |       |       | MI00380/Comm (3) |       |       |
|                                                    | Fertility       | Trans | %     | Fertility        | Trans | %     | Fertility        | Trans | %     |
| COR-SK                                             | 3               | 2     | 66.7% | 9                | 4     | 44.4% | 33               | 17    | 51.5% |
| A-0                                                | 30              | 17    | 56.7% | 20               | 12    | 60.0% | 13               | 9     | 69.2% |
| A-1                                                | 5               | 2     | 40.0% | 11               | 5     | 45.5% | 18               | 12    | 66.7% |
| A-2                                                | 5               | 2     | 40.0% | 20               | 13    | 65.0% | 32               | 13    | 40.6% |
| C-1                                                | 14              | 2     | 14.3% | 17               | 6     | 35.3% | 18               | 7     | 38.9% |
| D-1                                                | 11              | 5     | 45.5% | 9                | 5     | 55.6% | 14               | 7     | 50.0% |
| E-1                                                | 18              | 6     | 33.3% | 4                | 2     | 50.0% | 24               | 13    | 54.2% |
| F-1                                                | 16              | 8     | 50.0% | 18               | 9     | 50.0% | 21               | 15    | 71.4% |
| G-1                                                | 41              | 17    | 41.5% | 8                | 6     | 75.0% | 25               | 10    | 40.0% |
| H-1                                                | 8               | 4     | 50.0% | 10               | 5     | 50.0% | 12               | 6     | 50.0% |

  

| phiC31 MIMIC injections: OVERVIEW Phase 2 Swapping |                 |       |       |
|----------------------------------------------------|-----------------|-------|-------|
| Inj                                                | MI00494/wnd (3) |       |       |
|                                                    | Fertility       | Trans | %     |
| COR-SK                                             | 3               | 0     | 0.0%  |
| A-0                                                | 18              | 7     | 38.9% |
| A-1                                                | 12              | 1     | 8.3%  |
| A-2                                                | 14              | 5     | 35.7% |
| C-2                                                | 10              | 4     | 40.0% |
| D-2                                                | 10              | 6     | 60.0% |
| E-2                                                | 8               | 5     | 62.5% |
| F-2                                                | 9               | 6     | 66.7% |
| G-2                                                | 7               | 3     | 42.9% |
| H-2                                                | 3               | 1     | 33.3% |

  

| phiC31 MIMIC injections: OVERVIEW 5'UTR Swapping |                  |       |       |                |       |       |                  |       |       |                      |       |       |                         |       |       |
|--------------------------------------------------|------------------|-------|-------|----------------|-------|-------|------------------|-------|-------|----------------------|-------|-------|-------------------------|-------|-------|
| Inj                                              | MI00065/gogo (3) |       |       | MI00181/TI (3) |       |       | MI00249/CAPS (3) |       |       | MI00314/MYPT-75D (3) |       |       | MI00329/BM-40-SPARC (3) |       |       |
|                                                  | Fertility        | Trans | %     | Fertility      | Trans | %     | Fertility        | Trans | %     | Fertility            | Trans | %     | Fertility               | Trans | %     |
| 2                                                | 12               | 6     | 50.0% | 37             | 4     | 10.8% | 14               | 9     | 64.3% | 62                   | 22    | 35.5% | 15                      | 3     | 20.0% |
| 3                                                | 6                | 0     | 0.0%  | 29             | 9     | 31.0% | 14               | 9     | 64.3% | 30                   | 8     | 26.7% | 12                      | 6     | 50.0% |
| 4                                                | 5                | 0     | 0.0%  | 26             | 3     | 11.5% | 10               | 3     | 30.0% | 38                   | 5     | 13.2% | 15                      | 2     | 13.3% |

**Supplementary Table 6. Efficiency of RMCE conversion.** Fertile vials (Fertility), vials with transgenic progeny scored by loss of the *yellow*<sup>+</sup> marker of MiMIC (Trans) and RMCE efficiencies are indicated. RMCE efficiencies for protein-trapping experiments in intron phases 0, 1 and 2 for MiMIC insertions in coding introns, and for enhancer-

trapping experiments using MiMIC insertions in 5' UTR introns, are indicated. Plasmids used are the correction plasmid (COR-SK); the GAL4 (2), Flp (3), and QF (4) gene trap plasmids; and the EGFP-FIAsH-StrepII-3xFlag (A), mCherry (C), EBFP2-3xMyc (D), TagRFP-3xHA (E), HRP-S (F), Dendra-V5 (G) and Killer Red-V5 (H) protein-trap plasmids. Intron phases of the protein trap plasmids are indicated (0, 1 or 2).

**Supplementary Data. Plasmid inserts. Sequences of gene trap inserts and protein trap inserts.**

**GENE TRAP INSERTS**

**pBS-KS-attB1-2-GT-SA-GAL4-Hsp70pA *EcoRI/BamHI* insert**

**GAL4 ORF**

gaattcTAACTAACTAACAAAATGAAGCTACTGTCTTCTATCGAACAAGCATGCGATATTTGCC  
GACTTAAAAAGCTCAAGTGCTCCAAAGAAAAACCGAAGTGCGCCAAGTGTCTGAAGAACAACCTG  
GGAGTGTGCTACTCTCCCAAACCAAAGGTCTCCGCTGACTAGGGCACATCTGACAGAAGTG  
GAATCAAGGCTAGAAAGACTGGAACAGCTATTTCTACTGATTTTTCTCGAGAAGACCTTGACA  
TGATTTTGAAAATGGATTCTTTACAGGATATAAAAGCATTGTAAACAGGATTATTTGTACAAGA  
TAATGTGAATAAAGATGCCGTCACAGATAGATTGGCTTCAGTGAGACTGATATGCCCTTAACA  
TTGAGACAGCATAGAATAAGTGCGACATCATCATCGGAAGAGAGTAGTAACAAAGGTCAAAGAC  
AGTTGACTGTATCGATTGACTCGGCAGCTCATCATGATAACTCCACAATTCGGTTGGATTTTAT  
GCCCAGGGATGCTCTTCATGGATTTGATTGGTCTGAAGAGGATGACATGTCGGATGGCTTGCCC  
TTCCTGAAAACGGACCCCAACAATAATGGGTTCTTTGGCGACGGTTCTCTCTTATGTATTCTTC  
GATCTATTGGCTTTAAACCGGAAAATTACACGAACTCTAACGTTAACAGGCTCCCACCATGAT  
TACGGATAGATACAGTTGGCTTCTAGATCCACAACATCCCGTTTACTTCAAAGTTATCTCAAT  
AATTTTCACCCCTACTGCCCTATCGTGCCTCACCAGCCTAATGATGTTGTATAATAACCAGA  
TTGAAATCGCGTCGAAGGATCAATGGCAAATCCTTTTTAACTGCATATTAGCCATTGGAGCCTG  
GTGTATAGAGGGGAATCTACTGATATAGATGTTTTTTACTATCAAAATGCTAAATCTCATTG  
ACGAGCAAGGTCTTCGAGTCAGGTTCCATAATTTTGGTGACAGCCCTACATCTTCTGTCGCGAT  
ATACACAGTGGAGGCAGAAAACAAATACTAGCTATAATTTTCACAGCTTTTCCATAAGAATGGC  
CATATCATTTGGGCTTGAATAGGGACCTCCCCTCGTCTTTCAGTGATAGCAGCATTCTGGAACAA  
AGACGCCGAATTTGGTGGTCTGTCTACTCTTGGGAGATCCAATTGTCCCTGCTTTATGGTCGAT  
CCATCCAGCTTTCTCAGAATACAATCTCCTTCCCTTCTTCTGTCGACGATGTGCAGCGTACCAC  
AACAGGTCCCACCATATATCATGGCATCATTGAAACAGCAAGGCTCTTACAAGTTTTTCACAAAA  
ATCTATGAACTAGACAAAACAGTAACTGCAGAAAAAAGTCCTATATGTGCAAAAAAATGCTTGA  
TGATTTGTAATGAGATTGAGGAGGTTTTCGAGACAGGCACCAAAGTTTTTACAAATGGATATTTT  
CACCACCGCTCTAACCAATTTGTTGAAGGAACACCCTTGGCTATCCTTTACAAGATTCGAACTG  
AAGTGGAAACAGTTGTCTCTTATCATTTATGTATTAAGAGATTTTTTCACTAATTTTACCCAGA  
AAAAGTCACAACTAGAACAGGATCAAAATGATCATCAAAGTTATGAAGTTAAACGATGCTCCAT  
CATGTTAAGCGATGCAGCACAAAGAACTGTTATGTCTGTAAGTAGCTATATGGACAATCATAAT  
GTCACCCCATATTTTGCCTGGAATTGTTCTTATTACTTGTTCATGCAGTCCTAGTACCATAA  
AGACTCTACTCTCAAACCTCAAATCGAATGCTGAGAATAACGAGACCGCACAAATATTACAACA  
AATTAACACTGTTCTGATGCTATTAAAAAAAGTGGCCACTTTTAAAATCCAGACTTGTGAAAAA  
TACATTCAAGTACTGGAAGAGGTATGTGCGCCGTTTCTGTTATCACAGTGTGCAATCCCATTAC  
CGCATATCAGTTATAACAATAGTAATGGTAGCGCCATTAATAATATTGTCCGGTTCTGCAACTAT  
CGCCAATACCCTACTCTTCCGGAGGAAAATGTCAACAATATCAGTGTTAAATATGTTTCTCCT  
GGCTCAGTAGGGCCTTACCTGTGCCATTGAAATCAGGAGCAAGTTTCAGTGATCTAGTCAAGC  
TGTTATCTAACCGTCCACCCTCTCGTAACTCTCCAGTGACAATAACCAAGAAGCACACCTTCGCA  
TCGCTCAGTCACGCCTTTTCTAGGGCAACAGCAACAGCTGCAATCATTAGTGCCACTGACCCCG  
TCTGCTTTGTTTGGTGGCGCCAATTTTAATCAAAGTGGGAATATTGCTGATAGCTCATTGTCT



TCACITTTCACTAACAGTAGCAACGGTCCGAACCTCATAACAACCTCAAACAAATTTCTCAAGCGCT  
TTCACAACCAATTGCCTCCTCTAACGTTTCATGATAACTTTCATGAATAATGAAATCACGGCTAGT  
AAAATTGATGATGGTAATAATTCAAACCACTGTCACCTGGTTGGACGGACCAAACCTGCGTATA  
ACGCGTTTGGAACTACTACAGGGATGTTTAATACCACTACAATGGATGATGTATATAACTATCT  
ATTCGATGATGAAGATACCCACCAAACCCAAAAAAGAGTAA AATGAATCGTAGATACTGAAA  
AACCCCGCAAGTTCACCTCAACTGTGCATCGTGCACCATCTCAATTTCTTTTCATTTATACATCG  
TTTTGCCTTCTTTTATGTAACTATACTCCTCTAAGTTTCAATCTTGGCCATGTAACCTCTGATC  
TATAGAATTTTTTAAATGACTAGAATTAATGCCATCTTTTTTTTTGGACCTAAATTCTTCATGA  
AAATATATTACGAGGGCTTATTCAGAAGCTTATCGATACCGTCGACTAAAGCCAAATAGAAATT  
ATTCAGTTCTGGCTTAAGTTTTTAAAGTGATATTATTTATTTGGTTGTAACCAACCAAAGAA  
TGTAATAACTAATACATAATTATGTTAGTTTTAAGTTAGCAACAAATTGATTTTAGCTATATT  
AGCTACTTGGTTAATAAATAGAATATATTTATTTAAAGATAATTCGTTTTTATGTCAGGGAGT  
GAGTTTGCTTAAAAACTCGTTTAGATCCACTAGTTCTAGAGCGGCCggatcc

**pBS-KS-attB1-2-GT-SA-Flpo-SV40 EcoRI/BamHI insert**

**Flpo ORF**

gaattcTAACTAACTAACAAAATGAGCCAGTTCGACATCCTGTGCAAGACCCCCCAAGGTGC  
TGGTGC GGCAGTTCGTGGAGAGATTCGAGAGGCCAGCGGCGAGAAGATCGCCAGCTGTGCCGC  
CGAGCTGACCTACCTGTGCTGGATGATCACCACAACGGCACCGCCATCAAGAGGGCCACCTTC  
ATGAGCTACAACACCATCATCAGCAACAGCCTGAGCTTCGACATCGTGAACAAGAGCCTGCAGT  
TCAAGTACAAGACCCAGAAGGCCACCATCCTGGAGGCCAGCCTGAAGAAGCTGATCCCCGCTG  
GGAGTTCACCATCATCCCTTACAACGGCCAGAAGCACCAGAGCGACATCACCGACATCGTGTCC  
AGCCTGCAGCTGCAGTTCGAGAGCAGCGAGGAGGCCGACAAGGGCAACAGCCACAGCAAGAAGA  
TGCTGAAGGCCCTGCTGTCCGAGGGCGAGAGCATCTGGGAGATCACCGAGAAGATCCTGAACAG  
CTTCGAGTACACCAGCAGGTTACCAAGACCAAGACCCTGTACCAGTTCCTGTTCCCTGGCCACA  
TTCATCAACTGCGGCAGGTTACGCGACATCAAGAACGTGGACCCCAAGAGCTTCAAGCTGGTGC  
AGAACAAGTACCTGGGCGTGATCATTCAAGTGCCTGGTGACCGAGACCAAGACAAGCGTGTCCAG  
GCACATCTACTTTTTTCAGCGCCAGAGGCAGGATCGACCCCTGGTGTACCTGGACGAGTTCCTG  
AGGAACAGCGAGCCCCTGCTGAAGAGAGTGAACAGGACCGGCAACAGCAGCAGCAACAAGCAGG  
AGTACCAGCTGCTGAAGGACAACCTGGTGCGCAGCTACAACAAGGCCCTGAAGAAGAAGCCTCC  
CTACCCCATCTTCGCTATCAAGAACGGCCCTAAGAGCCACATCGGCAGGCACCTGATGACCAGC  
TTTCTGAGCATGAAGGGCCTGACCGAGCTGACAAACGTGGTGGGCAACTGGAGCGACAAGAGGG  
CCTCCGCCGTGGCCAGGACCACCTACACCACCAGATCACCGCCATCCCCGACCACTACTTCGC  
CCTGGTGTCCAGGTACTACGCCTACGACCCCATCAGCAAGGAGATGATCGCCCTGAAGGACGAG  
ACCAACCCCATCGAGGAGTGGCAGCACATCGAGCAGCTGAAGGGCAGCGCCGAGGGCAGCATCA  
GATACCCCGCCTGGAACGGCATCATCAGCCAGGAGGTGCTGGACTACCTGAGCAGCTACATCAA  
CAGGCGGATCTGATAATCTAGAGGATCTTTGTGAAGGAACCTTACTTCTGTGGTGTGACATAAT  
TGGACAAACTACCTACAGAGATTTAAAGCTCTAAGGTAAATATAAAATTTTTAAGTGTATAATG  
TGTTAAACTACTGATTCTAATTGTTTGTGTATTTTAGATTCCAACCTATGGAACCTGATGAATGG  
GAGCAGTGGTGGAAATGCCTTTAATGAGGAAAACCTGTTTTGCTCAGAAGAAATGCCATCTAGTG  
ATGATGAGGCTACTGCTGACTCTCAACATTCTACTCCTCCAAAAAAGAAGAGAAAGGTAGAAGA  
CCCCAAGGACTTTCCTTCAGAATTGCTAAGTTTTTTGAGTCATGCTGTGTTTAGTAATAGAACT  
CTTGCTTGCTTTGCTATTTACACCACAAAGGAAAAAGCTGCACTGCTATAACAAGAAAAATTATGG  
AAAAATATTTGATGTATAGTGCCTTGACTAGAGATCATAATCAGCCATACCACATTTGTAGAGG  
TTTTACTTGCTTTAAAAAACCTCCCACACCTCCCCCTGAACCTGAAACATAAAATGAATGCAAT  
TGTTGTTGTTAACTTGTATTGTCAGCTTATAATGGTTACAAATAAAGCAATAGCATCACAAAT  
TTCACAAATAAAGCATTTTTTTTCCTGCACTTAGTTGTGGTTTGTCCAAACTCATCAATGTAT  
CTTATCATGTCTGGATCggatcc

**pBS-KS-attB1-2-GT-SA-QF-Hsp70 EcoRI/BamHI insert**

**QF ORF**

gaattcTAACTAACTAACAAAATGCCGCCTAAACGCAAGACACTCAATGCCGCTGCCGAAGCCA  
ATGCCACGCTGATGGCCATGCTGATGGCAATGCTGATGGTCATGTTCGCTAACACTGCAGCAAG  
CAGCAACAACGCCCGTTTTGCGGACTTGACCAACATTGACACACCCGGCCTCGGCCCTACCACG  
ACGACGTTACTTGTTCGAGCCCGCTCGTTCGAAACGCCAGAGAGTCTCGAGGGCCTGTGATCAGT  
GTCGAGCTGCACGTGAAAAGTGTGATGGAATCCAGCCGGCTTGCTTCCCCTGTGTGTCGCAGGG  
CCGGTCGTGTACCTACCAGGCCAGTCCCAAGAAGCGAGGAGTCCAGACGGGCTACATCCGCACT  
CTCGAACTGGCTCTGGCTTGGATGTTTCGAGAACGTTGCCCGCAGCGAGGACGCCCTCCACAATC  
TTTTGGTCCGTGATGCTGGCCAGGGCAGCGCTCTCCTGGTCGGCAAAGACTCGCCTGCTGCAGA  
ACGCCTGCATGCAAGATGGGCGACGAGTCGAGTCAACAAAAGCATCACCCGTCTTCTCTCAGGT  
CAGGCCGCACAAGATCCATCTGAAGACGGCCAATCCCCGTCCGAAGACATAAATGTCCAAGATG  
CCGGGGCAAAGACATCCGACTTCCCTCATGCGCCTCACTTGACTTTCTCGGCGCCTAAGTCTAG  
TACAGCTGAGACACGCACTCTACCAGGCCGGTCCGACCACCTATTTCCGGCAAACACCCTGGAA  
AACAACTTTCAGCCAGATGGTACCGGGATAGGGAAGCTACCACCAATCATTGGCGCCTGCTGG  
ATATCTACTTTTTCTACACGCATTTCTTGGCTCCCTATCCTCGAGAAGAAAGACATGTACCAAGC  
ATTGTACCAGTACTCTGAACAAGGCTCGTTGCTTCCCTCTGCGAATGTCGAGTCTGGCGTTCAT  
GCCGAGCTCTGGAGCGCGCTCGCCCTGGCGTCTTCCAGGCTGCTGCTACTGCTGCATCGAGTG  
CTACGGGTCCAGCTTCAGCTGCTCATGGCCATGACAATGCCATCAATCCTTACCTGCAGACAT  
ATCTGACACAGCCCGAAAGCTCATACTTTGGAAAGCGGGCCGTTCCAGGTTCAGCACTGCAGA  
GCGTTGCTGCTTCTTTGTCTCGTAAGCCTTGGGCGGGATGATTGGGAGTCTGCTTGGTTGCTGG  
TTGGCTTTGCGGTCCGCGTCTTACTTGTGTTGTCACCCAGTTGCCTCCTGATGATGACCGGCC  
ACGACCAAGAATGCGTGCGCTGCTCGTTCGCGTGCTTCATCGTGGATACCATTGTGTCTATGAGA  
CACAACGTGCCGGCCCATCTCAAGCCAGACGACATTGCGGATCTGCCGTTACCTGAAGACGGTC  
AAGATCAATGGGAGCCGTGGACACCATGTGAGGGCTTAGGCGGTGAACACACCATGCTGCAAAT  
GTTGAGGAACCCGGCATAACCTTTAAGCACATTC AACACCTATATGGCGTGACCAAGCTGGTT  
GCTTTGGAGCTTCTGCCAAGAATACGAACATCTTACAGAACGCTCCCTTGGAGTTCAGGTGCG  
GGTTGCAGCAGGTAATCGGCCACAATTTCTCCCTTACAGCGTCTTTGTCTTTCCAGGATACAGC  
ATCGGCTTTTGTGCCTACTGCATACTTACCCGTACCGTTTATTTATGGGCAGCTGCCTTTTCT  
GAGCCTCTCAACGAACACTACTCGCATCTTCTGATCGAAACTCTTGATCAGTATCAGAAGCGGT  
TTGGTACATATGCAATCCACCTCTGATCCCTTCTCTTCTAGACTCCCTTCTTGCTTTAAAGAA  
ACAATCACATTTCTCAGAGCGGCATCGAAGGCACCTTGAAGAGCTTTTCCCCGCCTACTCCTCC  
ATTTGGCCTCGGGGAGGCCGACACAGCAATACTGGCCTCCAACCATAACGACAACTTGAGCTTC  
CGCCGACTGCGACTGCCACTGCAAGTATCATGCCCCATGTCATGGAACAGCCCCGTGCAACGTC  
AATAAATCCGGTCAATGATCGGTTTAAATGGAATACCGAATCCTACCCCTACAATAGCGATGCG  
GCCCTAGACGCAATTACTCAAACCAATGACTACGGATCAGTCAATACCCATGGCATTCTCAGTA  
CATATCCACCACCTGCCACCCACTTGAACGAGGCCTCGGTGGCCCTTGCAGCTGGAGGTGCTCC  
TCCAGACCACCCCGCCATAACGTTGATAGTACAACGAACCATCCTCCTTACCATAGTAACCTC  
GTCCCATGGCCAATTTCCGATATTCGACTGTAGACTATGATGCGATGGTGGATGATCTGGCAT  
CGATCGAGTACACGGATGCGGTTGACGTTGATCCGCAGTTCATGACGAACCTCGGGTTTGTCCC  
AGGGTGTAATTTAGCGATATCAACACGTATGAGCAATAGGACGTCTATCGATACCGTCGACTA  
AAGCCAAATAGAAAATTATTCAGTTTCTGGCTTAAAGTTTTTAAAAGTGATATTATTTATTTGGT  
TGTAACCAACCAAAGAATGTAAATAACTAATAACATAATTATGTTAGTTTTAAAGTTAGCAACAA  
ATTGATTTTATGCTATATTAGCTACTTGGTTAATAAATAGAATATATTTATTTAAAGATAATTGC  
GTTTTTATTGTCAGGGAGTGAGTTTGGCTTAAAACTCGTTTATAGATCCggtacc

## PROTEIN TRAP INSERTS

### pBS-KS-attB1-2-PT-SA-SD-0/1/2-EGFP-FIAsh-StreptII-TEV-3xFlag BamHI insert

GFP  
FIAsh  
StreptII  
TEV  
3xFlag

```
ggatccGTGTCCAAGGGCGAGGAGCTGTTACCGGCGTGGTGCCCATCCTGGTGGAGCTGGATG
GCGACGTGAACGGCCACAAGTTCAGCGTGCGCGGCGAGGGCGACGCCACCAACGGCAA
GCTGACCCTGAAGTTCATCTGCACCACCGGCAAGCTGCCCGTGCCCTGGCCCACCCTGGTGACC
ACCCTGACCTACGGCGTGCAGTGCTTCAGCCGCTACCCCGATCACATGAAGCAGCACGATTTCT
TCAAGAGCGCCATGCCCCGAGGGCTACGTGCAGGAGCGCACCATCAGCTTCAAGGATGACGGCAC
CTACAAGACCCGCGCCGAGGTGAAGTTCGAGGGCGATAACCCTGGTGAACCGCATCGAGCTGAAG
GGCATCGATTTCAAGGAGGATGGCAACATCCTGGGCCACAAGCTGGAGTACAACTTCAACAGCC
ACAACGTGTACATCACCGCCGATAAGCAGAAGAACGGCATCAAGGCCAACTTCAAGATCCGCCA
CAATGTGGAGGATGGCTCCGTGCAGCTGGCCGATCACTACCAGCAGAACACCCCCATCGGCGAC
GGCCAGTGCTGCTGCCCGATAACCACTACCTGAGCACCCAGAGCGTGCTGTCCAAGGACCCCA
ACGAGAAGCGCGATCACATGGTGTCTGCTGGAGTTCGTGACCGCCGCGGCATCACCTGGGCAT
GGATGAGCTGTACAAGGAGAGCAGCGGCAGCTTCCTGAACTGCTGCCAGGATGCTGCATGGAA
CCGGGAAGCGGCAACTGGTCCCACCCCCAGTTCGAGAAGGAAAACCTGTACTTCCAGAGCGATT
ACAAGGATCACGACGGCGACTACAAGGACCACGATATTGATTACAAGGACGATGACGACAAGGG
Cggatcc
```

**pBS-KS-attB1-2-PT-SA-SD-0/1/2-mCherry BamHI insert**

mCherry

```
ggatccGTGAGCAAGGGCGAGGAGGATAACATGGCCATCATCAAGGAGTTCATGCGCTTCAAGG  
TGCACATGGAGGGCTCCGTGAACGGCCACGAGTTCGAGATCGAGGGCGAGGGCGAGGGCCGCC  
CTACGAGGGCACCCAGACCGCCAAGCTGAAGGTGACCAAGGGTGGCCCCCTGCCCTTCGCCTGG  
GACATCCTGTCCCCTCAGTTCATGTACGGCTCCAAGGCCTACGTGAAGCACCCCGCCGACATCC  
CCGACTACTTGAAGCTGTCCTTCCCCGAGGGCTTCAAGTGGGAGCGCGTGATGAACTTCGAGGA  
CGGCGGCGTGGTGACCGTGACCCAGGACTCCTCCCTGCAGGACGGCGAGTTCATCTACAAGGTG  
AAGCTGCGCGGCACCAACTTCCCCTCCGACGGCCCCGTAATGCAGAAGAAGACCATGGGCTGGG  
AGGCCTCCTCCGAGCGGATGTACCCCGAGGACGGCGCCCTGAAGGGCGAGATCAAGCAGAGGCT  
GAAGCTGAAGGACGGCGGCCACTACGACGCTGAGGTCAAGACCACCTACAAGGCCAAGAAGCCC  
GTGCAGCTGCCCCGGCGCCTACAACGTCAACATCAAGTTGGACATCACCTCCCACAACGAGGACT  
ACACCATCGTGGAACAGTACGAACGCGCCGAGGGCCGCGCCACTCCACCGCGGCATGGACGAGCT  
GTACAAGGGCggatcc
```

**pBS-KS-attB1-2-PT-SA-SD-0/1/2-EBFP2-3xMyc BamHI insert**

EBFP2

3xMyc

ggatccGTGTCCAAGGGCGAGGAGCTGTTACCGGCGTGGTGCCCATCCTGGTGGAGCTGGATG  
GCGACGTGAACGGCCACAAGTTCAGCGTGC GCGGCGAGGGCGAGGGCGACGCCACCAACGGCAA  
GCTGACCCTGAAGTTCATCTGCACCACCGGCAAGCTGCCCGTGCCCTGGCCCACCCTGGTGACC  
ACCCTGAGCCACGGCGTGCAGTGCTTCGCCCGCTACCCCGATCACATGAAGCAGCACGATTTCT  
TCAAGAGCGCCATGCCCGAGGGCTACGTGCAGGAGCGCACCATTTTCTTCAAGGACGACGGCAC  
CTACAAGACCCGCGCCGAGGTGAAGTTCGAGGGCGATAACCCTGGTGAACCGCATCGAGCTGAAG  
GGCGTGGATTTCAAGGAGGATGGCAACATCCTGGGCCACAAGCTGGAGTACAACCTTCAACAGCC  
ACAACATCTACATCATGGCCGTGAAGCAGAAGAACGGCATCAAGGTCAACTTCAAGATCCGCCA  
CAACGTGGAGGATGGCTCCGTGCAGCTGGCCGATCACTACCAGCAGAACACCCCCATCGGCGAC  
GGCCCCGTGCTGCTGCCCGATAGCCACTACCTGAGCACCCAGAGCGTGCTGTCCAAGGACCCCA  
ACGAGAAGCGCGATCACATGGTGCTGCTGGAGTTCCGCACCGCCGCCGGCATCACCCCTGGGCAT  
GGATGAGCTGTACAAGGGAAGCGGCAGCAAAGCTCATCAGCGAGGAAGATCTGGAACAGAAG  
TTGATTTCCGAAGAGGACTTGGAGCAGAACTGATCTCGGAGGAGGATCTCGGCggatcc

**pBS-KS-attB1-2-PT-SA-SD-0/1/2-TagRFP-T-3xHA BamHI insert**

TagRFP

3xHA

ggatccGTGTCCAAGGGCGAGGAGCTGATCAAGGAGAACATGCACATGAAGCTGTACATGGAGG  
GCACCGTGAACAACCACCACTTCAAGTGCACCAGCGAGGGCGAGGGCAAGCCCTACGAGGGCAC  
CCAGACCATGCGCATCAAGGTGGTGGAGGGCGGCCCACTGCCCTTCGCCTTCGATATCCTGGCC  
ACCTCCTTCATGTACGGCAGCCGCACCTTCATCAACCACACCCAGGGCATCCCCGATTTCTTCA  
AGCAGAGCTTCCCCGAGGGCTTCACCTGGGAGCGCGTGACCACCTACGAGGATGGCGGCGTGCT  
GACCGCCACCCAGGATACCAGCCTGCAGGATGGCTGCCTGATCTACAACGTGAAGATCCGCGGC  
GTGAACTTCCCCAGCAACGGCCCCGTGATGCAGAAGAAGACCCTGGGCTGGGAGGCCAACCCG  
AGATGCTGTACCCCGCCGATGGCGGCCTGGAGGGCCGCACCGATATGGCCCTGAAGCTGGTCGG  
CGGCGGCCACCTGATCTGCAACTTCAAGACCACCTACCGCAGCAAGAAGCCCGCCAAGAACCTG  
AAGATGCCCGGCGTGTACTACGTGGATCACCGCCTGGAGCGCATTAAGGAGGCCGATAAGGAGA  
CCTACGTCGAGCAGCACGAGGTGGCCGTGGCCCGCTACTGCGATCTGCCGTCCAAGCTGGGACA  
CAAGCTGAACGGCATGGATGAGCTGTACAAGGGAAGCGGCTACCCATACGATGTGCCCGATTAC  
GCCTACCCGTATGACGTCCCGGACTATGCCTATCCCTACGACGTGCCAGACTACGCTGGCggat  
cc

**pBS-KS-attB1-2-PT-SA-SD-0/1/2-HRP-S BamHI insert**

HRP

S

ggatccCAGCTGACCCCCACCTTCTACGATAACAGCTGCCCAACGTGTCCAACATCGTGCGCG  
ATACCATCGTGAACGAGCTGCGCAGCGATCCCCGCATTGCCGCCAGCATCCTGCGCCTGCACTT  
CCACGATTGCTTCGTGAATGGCTGCGACGCCTCCATCCTGCTGGATAACACCACCTCGTTCCGC  
ACCGAGAAGGATGCCTTCGGCAACGCCAACAGCGCCCGTGGCTTCCCCGTGATCGATCGCATGA  
AGGCCGCCGTGGAGAGCGCTGCCACGCACCGTGTCTGCGCCGATCTGCTGACCATTGCCGC  
CCAGCAGAGCGTGACCCTGGCCGGAGGACCAAGTTGGCGTGTGCCACTGGGACGCCGCGATAGC  
CTGCAGGCCTTCTTGATCTGGCCAACGCCAACCTGCCAGCCCCCTTCTTACCCTGCCCCAGC  
TGAAGGATAGCTTCCGCAACGTGGGCCTGAACCGCAGCAGCGATCTGGTGGCCCTGAGCGGAGG  
ACACACCTTCGGCAAGAACCAGTGCCGCTTCATCATGGATCGCCTGTACAACCTCAGCAACACC  
GGCCTGCCCGATCCCACCCTGAACACCACCTACCTGCAGACCCTGCGCGGCCTGTGCCCCCTGA  
ACGGCAACCTGAGCGCCCTGGTGGATTTGATCTGCGCACCCCCACCATCTTCGACAACAAGTA  
CTACGTGAACCTGGAGGAGCAGAAGGGCCTGATCCAGAGCGATCAGGAGCTGTTTCAGCAGCCCC  
AACGCCACCGATAACCATCCCCCTGGTGCAGCTTCGCCAACTCGACCCAGACCTTCTTCAACG  
CCTTCGTGGAGGCCATGGATCGCATGGGCAACATCACCCCTGACCGGCACCCAGGGCCAGAT  
CCGCCTGAACTGCCGCGTGGTGAACAGCAACAGCGGAAGCGGCAAGGAGACCGCAGCCGCTAAG  
TTCGAGCGCCAGCACATGGATAGCGGCggatcc



**pBS-KS-attB1-2-PT-SA-SD-0/1/2-Dendra-V5 BamHI insert**

Dendra

V5

```
ggatccAACACCCCCGGCATCAACCTGATCAAGGAAGATATGCGCGTCAAGGTGCACATGGAGG
GCAACGTGAACGGCCACGCCTTCGTGATCGAGGGCGAGGGCAAGGGAAAGCCCTACGAGGGCAC
CCAGACCGCCAACCTGACCGTGAAGGAGGGAGCCCCGCTGCCCTTCAGCTACGATATCCTGACC
ACCGCCGTGCACTACGGCAACCGCGTGTTCACCAAGTACCCCCGAGGATATCCCCGATTACTTCA
AGCAGAGCTTCCCCGAGGGCTACAGCTGGGAGCGCACCATGACCTTCGAGGATAAGGGCATCTG
CACCATCCGCAGCGATATCAGCCTGGAGGGCGATTGCTTCTTCCAGAACGTGCGCTTCAAGGGC
ACCAACTTCCCCCCAACGGCCCCGTGATGCAGAAAAAGACCCTGAAGTGGGAGCCCAGCACCG
AGAAGCTGCACGTGCGCGACGGCCTGCTGGTCGGCAACATCAACATGGCCCTGCTGCTGGAGGG
CGGAGGACACTACCTGTGCGATTTCAAGACCACCTACAAGCCAAGAAGGTGGTCCAGCTGCC
GATGCCCACTTCGTGGATCACCGCATCGAGATCCTGGGCAACGATAGCGATTACAACAAGGTGA
AGCTGTACGAGCACGCCGTGGCCCGCTACAGCCCCCTGCCAGCCAGGTGTGGGGAAGCGGCGG
CAAGCCGATCCCGAATCCACTGCTCGGACTGGATAGCACCCGGCggatcc
```

**pBS-KS-attB1-2-PT-SA-SD-0/1/2-KillerRed-V5 BamHI insert**

Killerred

V5

```
ggatccGGCAGCGAGGGCGGACCAGCCCTGTTCCAGAGCGATATGACCTTCAAGATCTTCATCG
ACGGCGAGGTGAACGGCCAGAAGTTCACCATCGTCGCCGATGGCAGCAGCAAGTTCACCCACGG
CGATTTCAACGTGCACGCCGTGTGCGAGACCGGCAAGCTGCCCATGAGCTGGAAGCCCATCTGC
CACCTGATCCAGTACGGCGAGCCCTTCTTCGCCCCTACCCCGATGGCATCAGCCACTTCGCCC
AGGAGTGCTTCCCCGAGGGCCTGAGCATCGATCGCACCGTGCCTTCGAGAACGATGGCACCAT
GACCAGCCACCACACTACGAGCTGGATGATACCTGCGTGGTGTCCCGCATCACCGTGAAGTGC
GACGGCTTCCAGCCCGATGGCCCCATCATGCGCGATCAGCTGGTTCGATATCCTGCCCAACGAGA
CCCACATGTTCCCGCACGGCCCCAACGCCGTGCGCCAGCTGGCCTTCATCGGCTTACCACCGC
CGATGGCGGCCTGATGATGGGCCACTTCGATAGCAAGATGACCTTCAACGGCAGCCGCGCCATC
GAGATCCAGGCCCCACTTCGTGACCATCATACCAAGCAGATGCGCGATAACCAGCGATAAGC
GCGATCACGTGTGCCAGCGCGAGGTGGCCTACGCCACAGCGTGCCGCGCATCACCAGCGCCAT
CGGCTCCGATGAGGATGGAAGCGGCGGCAAGCCGATCCCGAATCCACTGCTCGGACTGGATAGC
ACCGGCggatcc
```
